# Supplementary material for: The Gut Microbial Community of Midas Cichlid Fish in Repeatedly Evolved Limnetic-Benthic Species Pairs
Source: PLoS One. 2014 Apr 14;9(4):e95027. doi: 10.1371/journal.pone.0095027 (PMC3986361; doi:10.1371/journal.pone.0095027)
Supplement: Table S1 — Sequencing statistics. For each individual, number of sequences before and after the processing steps are shown. (XLSX) [file pone.0095027.s001.xlsx]

## Sheet: Sheet1
Crater Lake	Species	Individual	Paired raw reads (number)	Merged filtered reads (number)
Apoyo	Amphilophus zaliosus (limnetic)	ZA_1	721344	308738
		ZA_2	649326	254623
		ZA_3	649988	267995
	Amphilophus astorquii (benthic)	AS_1	555740	207659
		AS_2	570008	245265
		AS_3	647952	243577
Xiloa	Amphilophus sagittae (limnetic)	SA_1	812690	341246
		SA_2	636336	262519
		SA_3	622124	260542
	Amphilophus amarillo (benthic)	AM_1	859286	376898
		AM_2	849744	315110
		AM_3	661108	263000

## Sheet: also to add
also add LPJ pc1 ext to main ms
