# Supplementary material for: The Gut Microbial Community of Midas Cichlid Fish in Repeatedly Evolved Limnetic-Benthic Species Pairs
Source: PLoS One. 2014 Apr 14;9(4):e95027. doi: 10.1371/journal.pone.0095027 (PMC3986361; doi:10.1371/journal.pone.0095027)
Supplement: Table S2 — For each of the 25 OTUs differentially represented in the comparison between benthic ( A. astorquii ) and limnetic ( A. zaliosus ) species of crater Lake Apoyo, sequence similarity search (BLASTn) results are reported. (XLSX) [file pone.0095027.s002.xlsx]

## Sheet: Sheet1
Cluster_ID	Species	Accession_Number	E-value	Higher in
Cluster1878	Shewanella haliotis strain DW01	ref|NR_044134.1|	1e-115	A. zaliosus
	Shewanella algae strain OK-1	ref|NR_028673.1|	1e-115
Cluster1991	Halomonas salifodinae strain BC7	ref|NR_044263.1|	6e-119	A. zaliosus
	Halomonas saccharevitans strain AJ275	ref|NR_044117.1|	6e-119
	Halomonas denitrificans strain M29	ref|NR_042491.1|	6e-119
	Halomonas kenyensis strain AIR-2	ref|NR_043299.1|	6e-119
	Halomonas campaniensis strain 5AG	ref|NR_042157.1|	6e-119
	Halomonas desiderata strain FB2	ref|NR_026274.1|	6e-119
Cluster3206	Halomonas hydrothermalis strain Slthf2	ref|NR_027220.1|	6e-124	A. zaliosus
	Halomonas axialensis strain Althf1	ref|NR_027219.1|	6e-124
	Halomonas alkaliphila strain 18bAG	ref|NR_042256.1|	6e-124
	Halomonas venusta strain DSM 4743	ref|NR_042069.1|	6e-124
	Halomonas meridiana strain DSM 5425	ref|NR_042066.1|	6e-124
	Halomonas aquamarina strain DSM 30161	ref|NR_042063.1|	6e-124
Cluster3781	Shewanella haliotis strain DW01	ref|NR_044134.1|	6e-119	A. zaliosus
	Shewanella algae strain OK-1	ref|NR_028673.1|	6e-119
Cluster3857	Halomonas salifodinae strain BC7	ref|NR_044263.1|	6e-99	A. astorquii
	Halomonas saccharevitans strain AJ275	ref|NR_044117.1|	6e-99
	Halomonas denitrificans strain M29	ref|NR_042491.1|	6e-99
	Halomonas kenyensis strain AIR-2	ref|NR_043299.1|	6e-99
	Halomonas campaniensis strain 5AG	ref|NR_042157.1|	6e-99
	Halomonas desiderata strain FB2	ref|NR_026274.1|	6e-99
Cluster4170	Halomonas salifodinae strain BC7	ref|NR_044263.1|	5e-95	A. zaliosus
	Halomonas saccharevitans strain AJ275	ref|NR_044117.1|	5e-95
	Halomonas denitrificans strain M29	ref|NR_042491.1|	5e-95
	Halomonas kenyensis strain AIR-2	ref|NR_043299.1|	5e-95
	Halomonas campaniensis strain 5AG	ref|NR_042157.1|	5e-95
	Halomonas desiderata strain FB2	ref|NR_026274.1|	5e-95
Cluster5182	Halomonas salifodinae strain BC7	ref|NR_044263.1|	3e-117	A. zaliosus
	Halomonas saccharevitans strain AJ275	ref|NR_044117.1|	3e-117
	Halomonas denitrificans strain M29	ref|NR_042491.1|	3e-117
	Halomonas kenyensis strain AIR-2	ref|NR_043299.1|	3e-117
	Halomonas taeanensis strain BH539	ref|NR_043087.1|	3e-117
	Halomonas campaniensis strain 5AG	ref|NR_042157.1|	3e-117
	Halomonas desiderata strain FB2	ref|NR_026274.1|	3e-117
Cluster5206	Halomonas salifodinae strain BC7	ref|NR_044263.1|	2e-119	A. zaliosus
	Halomonas koreensis strain SS20	ref|NR_025773.1|	2e-119
	Halomonas saccharevitans strain AJ275	ref|NR_044117.1|	2e-119
	Halomonas organivorans strain G-16.1	ref|NR_029029.1|	2e-119
	Halomonas denitrificans strain M29	ref|NR_042491.1|	2e-119
	Halomonas kenyensis strain AIR-2	ref|NR_043299.1|	2e-119
	Halomonas mongoliensis strain Z-7009	ref|NR_043298.1|	2e-119
	Halomonas campaniensis strain 5AG	ref|NR_042157.1|	2e-119
	Halomonas desiderata strain FB2	ref|NR_026274.1|	2e-119
Cluster5225	Halomonas salifodinae strain BC7	ref|NR_044263.1|	6e-119	A. zaliosus
	Halomonas saccharevitans strain AJ275	ref|NR_044117.1|	6e-119
	Halomonas denitrificans strain M29	ref|NR_042491.1|	6e-119
	Halomonas kenyensis strain AIR-2	ref|NR_043299.1|	6e-119
	Halomonas campaniensis strain 5AG	ref|NR_042157.1|	6e-119
	Halomonas desiderata strain FB2	ref|NR_026274.1|	6e-119
Cluster6176	Halomonas caseinilytica strain AJ261	ref|NR_044264.1|	6e-119	A. zaliosus
	Halomonas salifodinae strain BC7	ref|NR_044263.1|	6e-119
	Halomonas koreensis strain SS20	ref|NR_025773.1|	6e-119
	Halomonas saccharevitans strain AJ275	ref|NR_044117.1|	6e-119
	Halomonas organivorans strain G-16.1	ref|NR_029029.1|	6e-119
	Halomonas denitrificans strain M29	ref|NR_042491.1|	6e-119
	Halomonas kenyensis strain AIR-2	ref|NR_043299.1|	6e-119
	Halomonas mongoliensis strain Z-7009	ref|NR_043298.1|	6e-119
	Halomonas taeanensis strain BH539	ref|NR_043087.1|	6e-119
	Halomonas campaniensis strain 5AG	ref|NR_042157.1|	6e-119
	Halomonas desiderata strain FB2	ref|NR_026274.1|	6e-119
Cluster6354	Halomonas salifodinae strain BC7	ref|NR_044263.1|	6e-119	A. zaliosus
	Halomonas saccharevitans strain AJ275	ref|NR_044117.1|	6e-119
	Halomonas denitrificans strain M29	ref|NR_042491.1|	6e-119
	Halomonas kenyensis strain AIR-2	ref|NR_043299.1|	6e-119
	Halomonas campaniensis strain 5AG	ref|NR_042157.1|	6e-119
	Halomonas desiderata strain FB2	ref|NR_026274.1|	6e-119
Cluster6459	Halomonas salifodinae strain BC7	ref|NR_044263.1|	1e-120	A. astorquii
	Halomonas saccharevitans strain AJ275	ref|NR_044117.1|	1e-120
	Halomonas denitrificans strain M29	ref|NR_042491.1|	1e-120
	Halomonas kenyensis strain AIR-2	ref|NR_043299.1|	1e-120
	Halomonas campaniensis strain 5AG	ref|NR_042157.1|	1e-120
	Halomonas desiderata strain FB2	ref|NR_026274.1|	1e-120
Cluster7069	Enhydrobacter aerosaccus strain G	ref|NR_029005.1|	2e-119	A. astorquii
Cluster7080	Enhydrobacter aerosaccus strain G	ref|NR_029005.1|	1e-120	A. astorquii
Cluster7101	Comamonas testosteroni strain CNB-1	ref|NR_102841.1|	6e-119	A. astorquii
	Comamonas testosteroni strain KS 0043	ref|NR_029161.1|	6e-119
Cluster7696	Halomonas salifodinae strain BC7	ref|NR_044263.1|	6e-119	A. astorquii
	Halomonas saccharevitans strain AJ275	ref|NR_044117.1|	6e-119
	Halomonas denitrificans strain M29	ref|NR_042491.1|	6e-119
	Halomonas kenyensis strain AIR-2	ref|NR_043299.1|	6e-119
	Halomonas campaniensis strain 5AG	ref|NR_042157.1|	6e-119
	Halomonas desiderata strain FB2	ref|NR_026274.1|	6e-119
Cluster7986	Shewanella haliotis strain DW01	ref|NR_044134.1|	6e-119	A. zaliosus
	Shewanella algae strain OK-1	ref|NR_028673.1|	6e-119
Cluster8193	Halomonas salifodinae strain BC7	ref|NR_044263.1|	3e-117	A. zaliosus
	Halomonas saccharevitans strain AJ275	ref|NR_044117.1|	3e-117
	Halomonas denitrificans strain M29	ref|NR_042491.1|	3e-117
	Halomonas kenyensis strain AIR-2	ref|NR_043299.1|	3e-117
	Halomonas campaniensis strain 5AG	ref|NR_042157.1|	3e-117
	Halomonas desiderata strain FB2	ref|NR_026274.1|	3e-117
Cluster8722	Halomonas salifodinae strain BC7	ref|NR_044263.1|	5e-95	A. zaliosus
	Halomonas saccharevitans strain AJ275	ref|NR_044117.1|	5e-95
	Halomonas denitrificans strain M29	ref|NR_042491.1|	5e-95
	Halomonas kenyensis strain AIR-2	ref|NR_043299.1|	5e-95
	Halomonas campaniensis strain 5AG	ref|NR_042157.1|	5e-95
	Halomonas desiderata strain FB2	ref|NR_026274.1|	5e-95
Cluster8940	Shewanella haliotis strain DW01	ref|NR_044134.1|	6e-119	A. zaliosus
	Shewanella algae strain OK-1	ref|NR_028673.1|	6e-119
Cluster9248	Halomonas salifodinae strain BC7	ref|NR_044263.1|	1e-120	A. zaliosus
	Halomonas saccharevitans strain AJ275	ref|NR_044117.1|	1e-120
	Halomonas denitrificans strain M29	ref|NR_042491.1|	1e-120
	Halomonas kenyensis strain AIR-2	ref|NR_043299.1|	1e-120
	Halomonas campaniensis strain 5AG	ref|NR_042157.1|	1e-120
	Halomonas desiderata strain FB2	ref|NR_026274.1|	1e-120
Cluster9495	Vibrio harveyi strain ATCC BAA	ref|NR_102976.1|	6e-119	A. zaliosus
	Vibrio parahaemolyticus RIMD 2210633 strain	ref|NR_074196.1|	6e-119
	Vibrio campbellii strain 40	ref|NR_029222.1|	6e-119
	Vibrio sinaloensis strain CAIM 797	ref|NR_043858.1|	6e-119
	Vibrio hepatarius strain LMG 20362	ref|NR_025491.1|	6e-119
	Vibrio rotiferianus strain LMG 21460	ref|NR_042081.1|	6e-119
	Vibrio xuii strain R-15052	ref|NR_025478.1|	6e-119
	Vibrio brasiliensis strain LMG 20546	ref|NR_025477.1|	6e-119
	Vibrio neptunius strain LMG 20536	ref|NR_025476.1|	6e-119
	Vibrio ichthyoenteri strain DSM	ref|NR_042122.1|	6e-119
Cluster9777	Halomonas pacifica strain 62	ref|NR_025927.1|	3e-121	A. zaliosus
Cluster9881	Halomonas salifodinae strain BC7	ref|NR_044263.1|	3e-122	A. zaliosus
	Halomonas saccharevitans strain AJ275	ref|NR_044117.1|	3e-122
	Halomonas denitrificans strain M29	ref|NR_042491.1|	3e-122
	Halomonas kenyensis strain AIR-2	ref|NR_043299.1|	3e-122
	Halomonas campaniensis strain 5AG	ref|NR_042157.1|	3e-122
	Halomonas desiderata strain FB2	ref|NR_026274.1|	3e-122
Cluster9963	Halomonas salifodinae strain BC7	ref|NR_044263.1|	6e-119	A. zaliosus
	Halomonas saccharevitans strain AJ275	ref|NR_044117.1|	6e-119
	Halomonas denitrificans strain M29	ref|NR_042491.1|	6e-119
	Halomonas kenyensis strain AIR-2	ref|NR_043299.1|	6e-119
	Halomonas campaniensis strain 5AG	ref|NR_042157.1|	6e-119
	Halomonas desiderata strain FB2	ref|NR_026274.1|	6e-119
